## **Assessing the Causal Effects of Environmental Tobacco Smoke Exposure: A meta-analytic Mendelian randomisation study**

Benjamin Woolf<sup>1,2,3</sup>, Skanda Rajasundaram<sup>4,5</sup>, Dipender Gill<sup>6\*</sup>, Hannah M. Sallis<sup>2,7\*</sup>, Marcus R.  
Munafò<sup>1,2\*</sup>

<sup>1</sup> School of Psychological Science, University of Bristol, Bristol, UK

<sup>2</sup> MRC Integrative Epidemiology Unit at the University of Bristol, Bristol, UK

<sup>3</sup> MRC Biostatistics Unit at the University of Cambridge, Cambridge, UK

<sup>4</sup> Centre for Evidence-Based Medicine, University of Oxford, Oxford, UK

<sup>5</sup> Faculty of Medicine, Imperial College London, London, UK

<sup>6</sup> Department of Epidemiology and Biostatistics, School of Public Health, Imperial College London,  
London, United Kingdom

<sup>8</sup> Centre for Academic Mental Health, Population Health Sciences, Bristol Medical School, University  
of Bristol, Bristol, UK

The authors have withdrawn their manuscript owing to an issue, which they were recently alerted to, with GWAS of paternal smoking used here. They hope to update the manuscript with an alternative GWAS as soon as possible. Therefore, the authors do not wish this work to be cited as reference for the project. If you have any questions, please contact the corresponding author.
